# Supplementary material for: The aging-related risk signature in colorectal cancer
Source: publisher site journal article supplement (doi:10.18632/aging.202589), 2021-02-26
Supplement: Supplementary file [file aging-v13i5-202589-supplementary-material-SD1.pdf]

**SUPPLEMENTARY FIGURE**

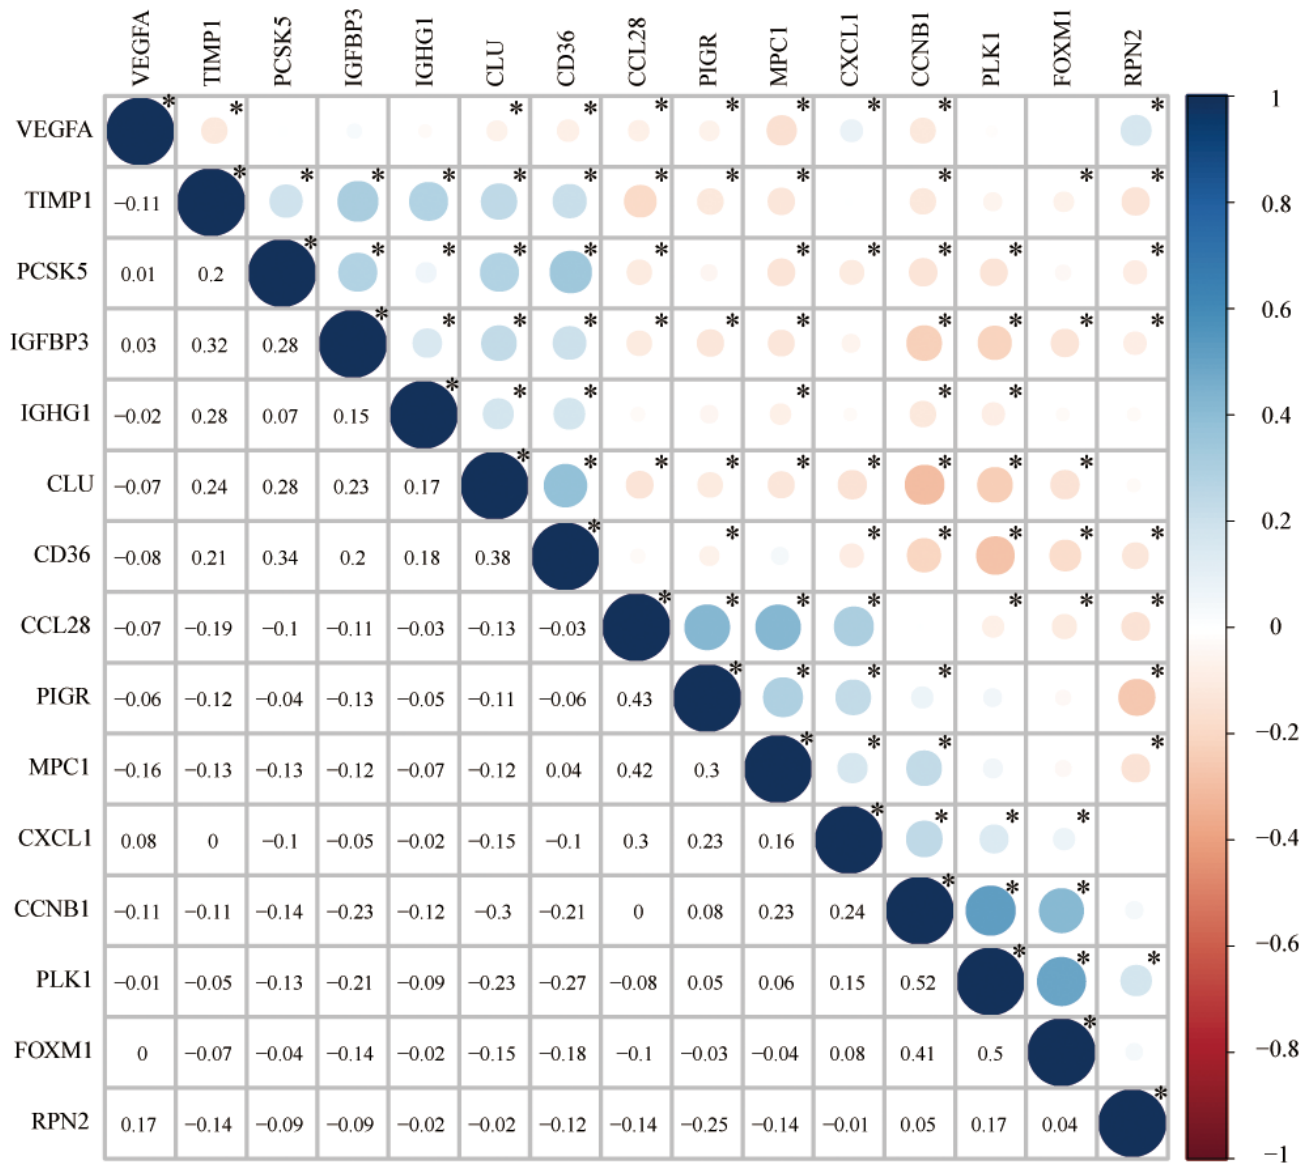

**Supplementary Figure 1. Pearson correlation analysis between 15 hub genes.** The bar on the left of the map indicated the legend of the Pearson correlation coefficient. Dots size and values showed the degree of their correlation, and dots color indicated whether they were positive-related (blue dots) or negative-related (red dots). \* meant significance ( $p < 0.05$ ).
